# Supplementary material
Source: HighWire-hosted journal article supplement (https://bmjopen.bmj.com/content/15/3/e094168)
Supplement: inline-supplementary-material-1 [file inline-supplementary-material-1.pdf]

## Supplemental file 1

**SEARCH STRATEGY****Web Of Science**

1. (pharmacist\* or pharmacy or pharmacies) NEAR/3 (community or led or based or role or intervention\*)  
  
AND
2. ((cardio\* or CVD or cardiac or heart\* or coronary or CHD or myocardial or "Atrial fibrillation" or AF) or (cerebrovascular or stroke or TIA or "transient ischaemic attack" or "transient ischemic attack") or ((arterial or heart) NEAR/1 disease\*) or heart failure) or (lifestyle or diet\* or physical activity or weight or body mass index or BMI or blood pressure or hypertension or cholesterol or advice or counselling or screening or health check or smoking or alcohol or adherence or compliance)  
  
AND
3. Minorit\* or ethnic\* or multiethnic\* or "multi-ethnic" or race or racial or multiracial or cultur\* or (BAME or BME) or ((underserv\* or disadvantage\*) NEAR/2 (group\* or population\* or communit\*)) or migrant\* or immigrant\* or refugee\* or (asylum NEAR/1 seek\*) or multilingual

**EMBASE**

1. (((pharmacist\* or pharmacy or pharmacies) adj3 (community or led or based or role or intervention\*)))  
  
AND
2. (cardio\* or CVD or cardiac or heart\* or coronary or CHD or myocardial or "Atrial fibrillation" or AF or (cerebrovascular or stroke or TIA or "transient ischaemic attack" or "transient ischemic attack") or ((arterial or heart) adj1 disease\*) or heart failure or (lifestyle or diet\* or physical activity or weight or body mass index or BMI or blood pressure or hypertension or cholesterol or advice or counselling or screening or health check or smoking or alcohol or adherence or compliance))  
  
AND
3. (Minorit\* or ethnic\* or multiethnic\* or "multi-ethnic" or race or racial or multiracial or cultur\* or (BAME or BME) or ((underserv\* or disadvantage\*) adj2 (group\* or population\* or communit\*)) or migrant\* or immigrant\* or refugee\* or (asylum adj1 seek\*) or multilingual)).af.

**PubMed**

## Supplemental file 1

1. (pharmacist\* or pharmacy or pharmacies) NEAR/3 (community or led or based or role or intervention\*)  
  
AND
2. ((cardio\* or CVD or cardiac or heart\* or coronary or CHD or myocardial or “Atrial fibrillation” or AF) or (cerebrovascular or stroke or TIA or “transient ischaemic attack” or “transient ischemic attack”) or ((arterial or heart) NEAR/1 disease\*) or heart failure) or (lifestyle or diet\* or physical activity or weight or body mass index or BMI or blood pressure or hypertension or cholesterol or advice or counselling or screening or health check or smoking or alcohol or adherence or compliance)  
  
AND
3. Minorit\* or ethnic\* or multiethnic\* or “multi-ethnic” or race or racial or multiracial or cultur\* or (BAME or BME) or ((underserv\* or disadvantage\*) NEAR/2 (group\* or population\* or communit\*)) or migrant\* or immigrant\* or refugee\* or (asylum NEAR/1 seek\*) or multilingual

## Scopus

1. (pharmacist\* or pharmacy or pharmacies) NEAR/3 (community or led or based or role or intervention\*)  
  
AND
2. ((cardio\* or CVD or cardiac or heart\* or coronary or CHD or myocardial or “Atrial fibrillation” or AF) or (cerebrovascular or stroke or TIA or “transient ischaemic attack” or “transient ischemic attack”) or ((arterial or heart) NEAR/1 disease\*) or heart failure) or (lifestyle or diet\* or physical activity or weight or body mass index or BMI or blood pressure or hypertension or cholesterol or advice or counselling or screening or health check or smoking or alcohol or adherence or compliance)  
  
AND
3. Minorit\* or ethnic\* or multiethnic\* or “multi-ethnic” or race or racial or multiracial or cultur\* or (BAME or BME) or ((underserv\* or disadvantage\*) NEAR/2 (group\* or population\* or communit\*)) or migrant\* or immigrant\* or refugee\* or (asylum NEAR/1 seek\*) or multilingual

## Supplemental file 1

**The Cumulative Index to Nursing and Allied Health Literature.**

1. (pharmacist\* or pharmacy or pharmacies) NEAR/3 (community or led or based or role or intervention\*)

AND

2. ((cardio\* or CVD or cardiac or heart\* or coronary or CHD or myocardial or “Atrial fibrillation” or AF) or (cerebrovascular or stroke or TIA or “transient ischaemic attack” or “transient ischemic attack”) or ((arterial or heart) NEAR/1 disease\*) or heart failure) or (lifestyle or diet\* or physical activity or weight or body mass index or BMI or blood pressure or hypertension or cholesterol or advice or counselling or screening or health check or smoking or alcohol or adherence or compliance)

AND

3. Minorit\* or ethnic\* or multiethnic\* or “multi-ethnic” or race or racial or multiracial or cultur\* or (BAME or BME) or ((underserv\* or disadvantag\*) NEAR/2 (group\* or population\* or communit\*)) or migrant\* or immigrant\* or refugee\* or (asylum NEAR/1 seek\*) or multilingual
